# Supplementary material
Source: Springer Nature journal article supplement (https://www.springermedizin.de/resource/supplementary/13024_2011_214_MOESM3_ESM.pdf/9643688)

**A**

AT1

AT2

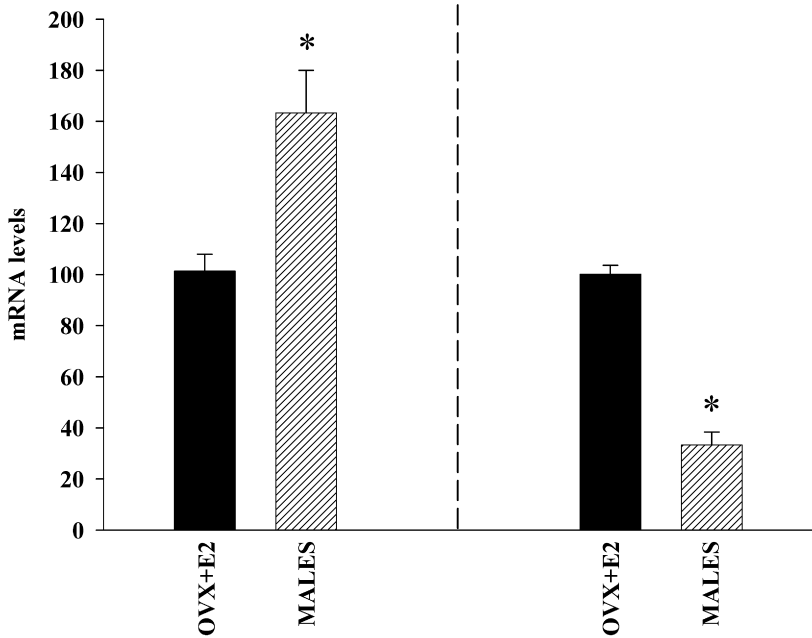**B**

AT1

AT2

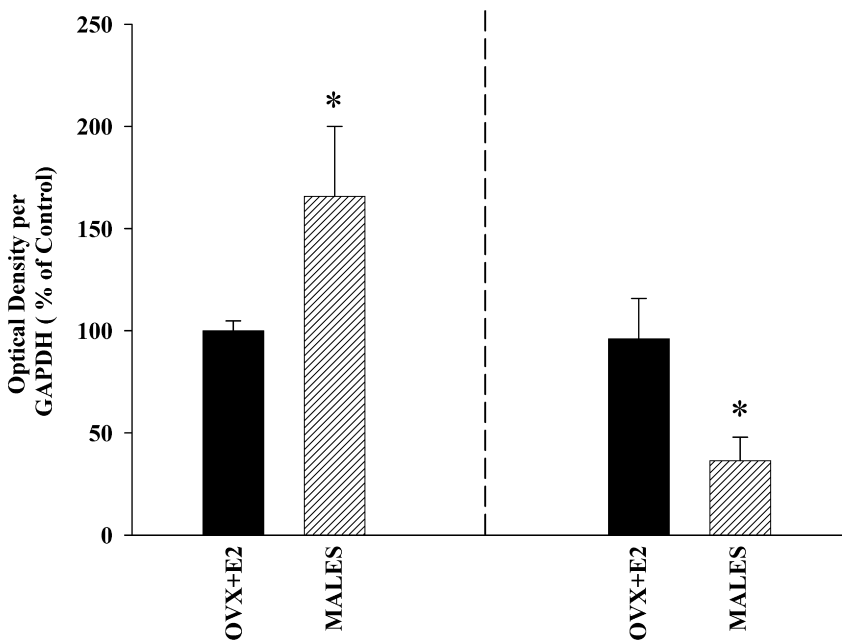

Supplement: MOESM3 [file 9643688]
